# Supplementary material
Source: PubMed Central journal article supplement (PMC2837281)
Supplement: NIHMS182973-supplement-supplement_1.pdf [file NIHMS182973-supplement-supplement_1.pdf]

## Engineering of Fluorescent Energy Conversion Arm of Phi29 DNA Packaging Motor for Single Molecule Studies

*Tae Jin Lee, Hui Zhang, Chun-Li Chang, Cagri Savran, and Peixuan Guo\**

### Supporting Information 1

Amino acid sequence map of the eGFP-gp16 showing that the N-terminus of the original 332 amino acids of native gp16 (underlined starting with MDKSLF) was extended with 266 amino acids, as a result 239 amino acid coding for fluorescent eGFP (italic starting with MVSKGE) and a His-tag (underlined italic six H) along with linker sequences.

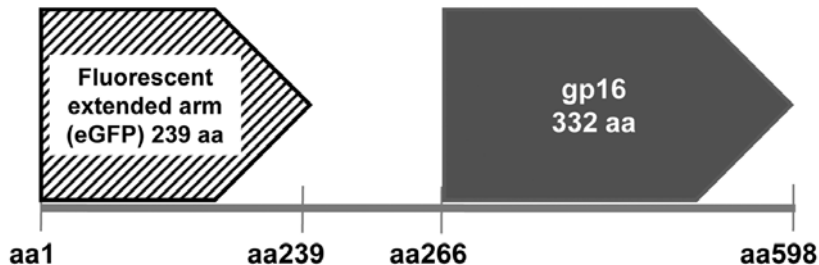

```

MVSKGEELFTGVVPILVELDGDVNGHKFSVSGEGEGDATYGKLTCLKF
ICTTGKLPVPWPTLVTTLTYGVCFSRYPDHMKQHDFKSPAMPEGYV
QERTIFFKDDGNYKTRAEVKFEGDTLVNRIELKGIDFKEDGNILGHKL
EYNYNSHNVYIMADKQKNGIKVNFKIRHNIEDGSVQLADHYQQNTPIG
DGPVLLPDNHYLSTQSALSNDPNEKRDHMLLEFVTAAGITLGMDEL
YKGSQSGHMHHHHHHSSGGTGGGSGIEGRMDKSLF.....FRKMRIQ

```
